# Supplementary figures and images for: c-Myc-regulated microRNAs modulate E2F1 expression
Source: Springer Nature journal article supplement (doi:10.1038/nature03677), 2005-06-01

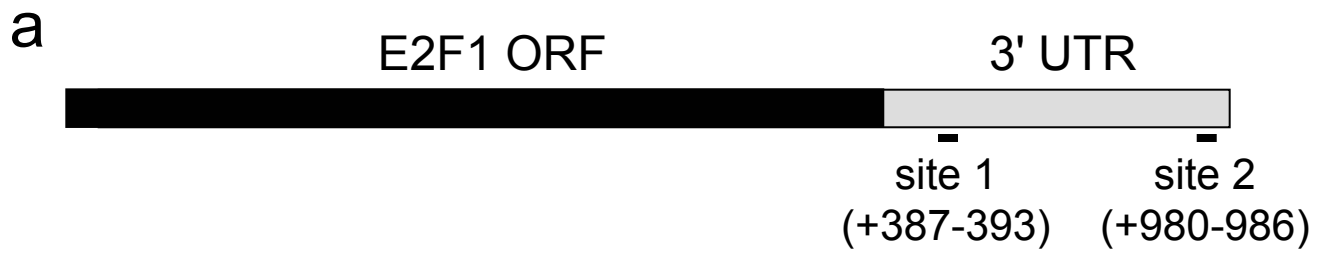

**b**

site 1

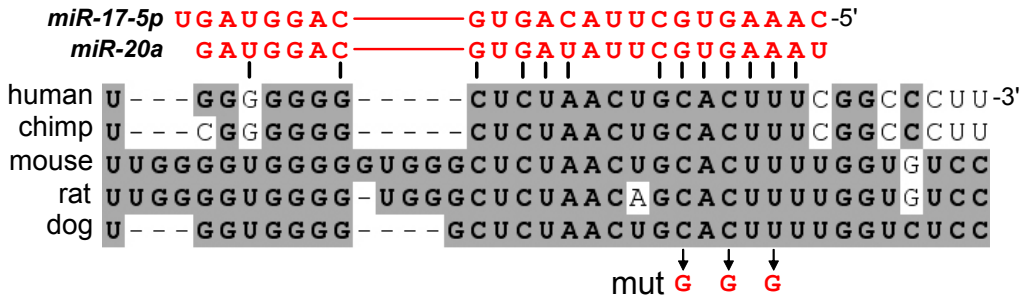

site 2

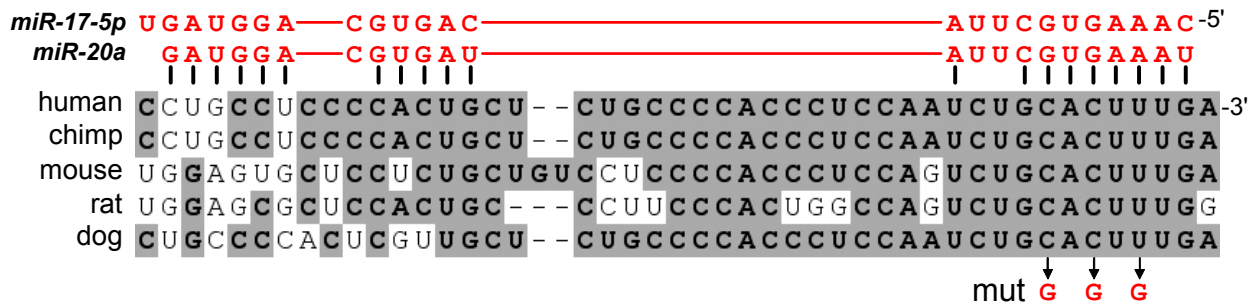

**c**

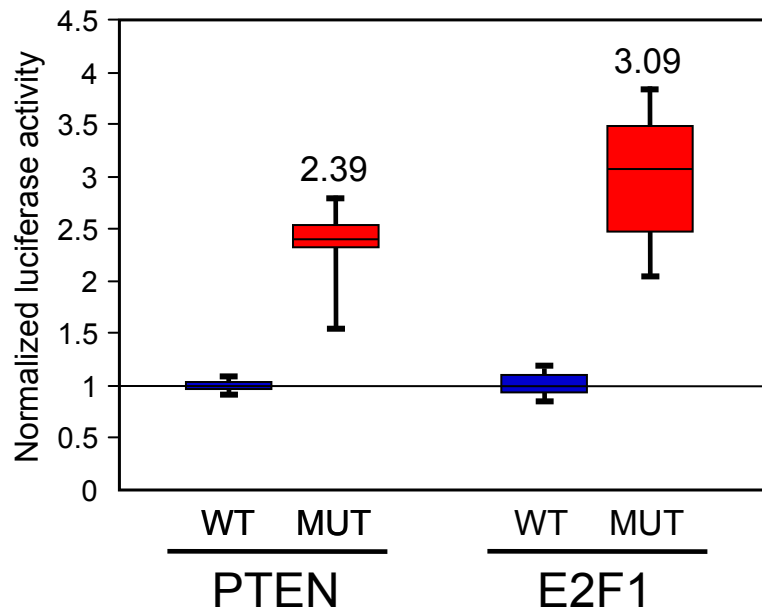

Supplement: nature03677-s1.pdf [file nature03677-s1.pdf]
